# Supplementary material for: Genome-wide identification of the PEBP genes in pears and the putative role of PbFT in flower bud differentiation
Source: PeerJ. 2020 Apr 9;8:e8928. doi: 10.7717/peerj.8928 (PMC7151754; doi:10.7717/peerj.8928)
Supplement: Supplemental Information 13 [file peerj-08-8928-s013.xlsx]

## Sheet: rosette leaves
	1	2	3	4	5	6	7	average	S.D.
WT	19	16	17	20	18	17	21	18.2857	1.66599				WT	15	1.85164
PbFT-OE3	9	8	8	10	8	9		8.66667	0.745356				OE-3	9	0.816497
PbFT-OE9	10	8	10	11	12	10		10.1667	1.21335				OE-9	10.5	0.763763

## Sheet: Day to flowering
	1	2	3	4	5	6	7	8	9	average	S.D.
WT	29	35	30	35	37	31	34	29	29	32.1111	2.96065
PbFT-OE3	25	24	24	25	25	23				24.3333	0.745356
PbFT-OE9	25	26	23	27	26	25				25.3333	1.24722

## Sheet: The diameter of stem
	1	2	3	4	5	6	7	8	9	average	S.D.
WT	1.35	1.58	1.64	1.74	1.59	1.67	1.32	1.89	1.69	1.60778	0.169691
PbFT-OE3	0.76	0.69	0.82	0.79	0.72					0.756	0.0467333
PbFT-OE9	0.76	0.77	1.06	0.84	0.67					0.82	0.131605

## Sheet: Expression
Sample Name	actin	Cq	ΔCt		ΔΔCt	2（-ΔΔCt）	average	S.D.
WT	20.9	25.62	4.72	4.52	0.2	0.870551	1.00554	0.104477
WT	21.53	26.02	4.49	4.52	-0.03	1.02101
WT	20.83	25.18	4.35	4.52	-0.17	1.12506
PbFT-OE3	20.98	19.61	-1.37	4.52	-5.89	59.3016	74.5264	13.3333
PbFT-OE3	20.02	18.36	-1.66	4.52	-6.18	72.5046
PbFT-OE3	20.42	18.42	-2	4.52	-6.52	91.7731
PbFT-OE9	20.06	18.89	-1.17	4.52	-5.69	51.6251	63.0424	10.0634
PbFT-OE9	20.63	19.21	-1.42	4.52	-5.94	61.3929
PbFT-OE9	20.65	18.92	-1.73	4.52	-6.25	76.1093
