# Supplementary material for: Genome-wide identification of the PEBP genes in pears and the putative role of PbFT in flower bud differentiation
Source: PeerJ. 2020 Apr 9;8:e8928. doi: 10.7717/peerj.8928 (PMC7151754; doi:10.7717/peerj.8928)
Supplement: Supplemental Information 14 [file peerj-08-8928-s014.xlsx]

## Sheet: 45DAB
Sample Name	ACTIN	Cq	ΔCt		ΔΔCt	2（-ΔΔCt）	average	S.E.		correct	lest	correct	average	S.E.
9	23.12	26.44	3.32	3.35	-0.03	1.02101	1.001	0.0443447		1.02101	0.210224	4.85678	4.76159	0.21094
9	22.33	25.62	3.29	3.35	-0.06	1.04247				1.04247	0.210224	4.95883
9	22.89	26.33	3.44	3.35	0.09	0.939523				0.939523	0.210224	4.46915
12	21.93	25.43	3.5	3.35	0.15	0.90125	0.867449	0.0393569		0.90125	0.210224	4.28709	4.1263	0.187214
12	21.8	25.32	3.52	3.35	0.17	0.888843				0.888843	0.210224	4.22807
12	21.77	25.42	3.65	3.35	0.3	0.812252				0.812252	0.210224	3.86375
15	22.24	26.19	3.95	3.35	0.6	0.659754	0.863364	0.16824		0.659754	0.210224	3.13834	4.10688	0.800291
15	22.64	25.89	3.25	3.35	-0.1	1.07177				1.07177	0.210224	5.09824
15	21.83	25.4	3.57	3.35	0.22	0.858565				0.858565	0.210224	4.08405
18	23.21	26.55	3.34	3.35	-0.01	1.00696	0.931075	0.0656778		1.00696	0.210224	4.78991	4.42896	0.312418
18	22.53	25.97	3.44	3.35	0.09	0.939523				0.939523	0.210224	4.46915
18	22.49	26.08	3.59	3.35	0.24	0.846745				0.846745	0.210224	4.02782
21	21.91	26.49	4.58	3.35	1.23	0.426317	0.451154	0.0219174		0.426317	0.210224	2.02792	2.14606	0.104257
21	21.74	26.15	4.41	3.35	1.06	0.479632				0.479632	0.210224	2.28153
21	22.25	26.76	4.51	3.35	1.16	0.447513				0.447513	0.210224	2.12874
24	21.91	26.48	4.57	3.35	1.22	0.429283	0.354804	0.0712351		0.429283	0.210224	2.04202	1.68774	0.338853
24	22.05	27.35	5.3	3.35	1.95	0.258816				0.258816	0.210224	1.23114
24	22.53	27.29	4.76	3.35	1.41	0.376312				0.376312	0.210224	1.79005
3	22.07	27.29	5.22	3.35	1.87	0.273573	0.265553	0.0399105		0.273573	0.210224	1.30134	1.26319	0.189847
3	21.49	27.07	5.58	3.35	2.23	0.213159				0.213159	0.210224	1.01396
3	21.94	26.98	5.04	3.35	1.69	0.309927				0.309927	0.210224	1.47427
6	22.44	27.7	5.26	3.35	1.91	0.266093	0.310025	0.104163		0.266093	0.210224	1.26576	1.47474	0.495486
6	22.55	28.15	5.6	3.35	2.25	0.210224				0.210224	0.210224	1
6	22.64	27.13	4.49	3.35	1.14	0.45376				0.45376	0.210224	2.15846

## Sheet: 75DAB
Sample Name		ACTIN	ΔCt		ΔΔCt	2（-ΔΔCt）	average	S.E.		correct	lest	correct	average	S.E.
9	26.64	22.98	3.66	3.93333	-0.273333	1.2086	1.05388	0.309995		1.2086	0.0515935	23.4254	20.4266	6.00841
9	26.36	22.84	3.52	3.93333	-0.413333	1.33176				1.33176	0.0515935	25.8125
9	25.73	21.11	4.62	3.93333	0.686667	0.621288				0.621288	0.0515935	12.042
12	25.62	23.51	2.11	3.93333	-1.82333	3.53898	3.0611	0.373652		3.53898	0.0515935	68.5935	59.331	7.24223
12	25.63	23.29	2.34	3.93333	-1.59333	3.01746				3.01746	0.0515935	58.4852
12	25.75	23.21	2.54	3.93333	-1.39333	2.62685				2.62685	0.0515935	50.9143
15	26.66	23.3	3.36	3.93333	-0.573333	1.48796	1.92357	0.490385		1.48796	0.0515935	28.84	37.2831	9.50478
15	26.25	23.06	3.19	3.93333	-0.743333	1.67404				1.67404	0.0515935	32.4467
15	26.32	23.77	2.55	3.93333	-1.38333	2.6087				2.6087	0.0515935	50.5626
18	25.98	22.85	3.13	3.93333	-0.803333	1.74513	1.66586	0.818923		1.74513	0.0515935	33.8246	32.2882	15.8726
18	27.46	22.85	4.61	3.93333	0.676667	0.625609				0.625609	0.0515935	12.1257
18	26.17	23.63	2.54	3.93333	-1.39333	2.62685				2.62685	0.0515935	50.9143
21	28.02	21.92	6.1	3.93333	2.16667	0.222725	0.432066	0.171662		0.222725	0.0515935	4.31691	8.37442	3.3272
21	27.24	22.09	5.15	3.93333	1.21667	0.430276				0.430276	0.0515935	8.33973
21	26.76	22.19	4.57	3.93333	0.636667	0.643197				0.643197	0.0515935	12.4666
24	30.37	22.71	7.66	3.93333	3.72667	0.0755373	0.0871375	0.0347395		0.0755373	0.0515935	1.46409	1.68892	0.673331
24	29.01	22.18	6.83	3.93333	2.89667	0.134282				0.134282	0.0515935	2.60268
24	31.05	22.84	8.21	3.93333	4.27667	0.0515935				0.0515935	0.0515935	1
3	31.3	27.41	3.89	3.93333	-0.0433333	1.03049	1.02634	0.0348848		1.03049	0.0515935	19.9733	19.8927	0.676148
3	31.7	27.86	3.84	3.93333	-0.0933333	1.06683				1.06683	0.0515935	20.6776
3	32.23	28.27	3.96	3.93333	0.0266667	0.981686				0.981686	0.0515935	19.0273
6	29.7	23.95	5.75	3.93333	1.81667	0.283876	0.309045	0.0181656		0.283876	0.0515935	5.50217	5.99	0.352092
6	29.19	23.6	5.59	3.93333	1.65667	0.317171				0.317171	0.0515935	6.1475
6	29.69	24.14	5.55	3.93333	1.61667	0.326088				0.326088	0.0515935	6.32033

## Sheet: 105DAB
Sample Name	ACTIN	Cq	ΔCt		ΔΔCt	2（-ΔΔCt）	average	S.E.		correct	lest	correct	average	S.E.
9	21.22	28.12	6.9	7.01	-0.11	1.07923	1.00151	0.0555614		1.07923	0.0285572	37.7918	35.0702	1.94562
9	20.87	27.92	7.05	7.01	0.04	0.972655				0.972655	0.0285572	34.0598
9	19.99	27.07	7.08	7.01	0.07	0.952638				0.952638	0.0285572	33.3589
12	19.78	27.2	7.42	7.01	0.41	0.752623	0.922436	0.122221		0.752623	0.0285572	26.3549	32.3013	4.27986
12	19.92	26.96	7.04	7.01	0.03	0.97942				0.97942	0.0285572	34.2968
12	19.32	26.28	6.96	7.01	-0.05	1.03526				1.03526	0.0285572	36.2523
15	19.86	26.87	7.01	7.01	0	1	1.34729	0.350753		1	0.0285572	35.0174	47.1784	12.2825
15	19.19	25.33	6.14	7.01	-0.87	1.82766				1.82766	0.0285572	64
15	19.41	26.14	6.73	7.01	-0.28	1.21419				1.21419	0.0285572	42.5179
18	19.71	27	7.29	7.01	0.28	0.823591	1.15723	0.43072		0.823591	0.0285572	28.84	40.5233	15.0827
18	19.69	25.88	6.19	7.01	-0.82	1.76541				1.76541	0.0285572	61.8199
18	19.38	26.57	7.19	7.01	0.18	0.882703				0.882703	0.0285572	30.91
21	19.42	27.68	8.26	7.01	1.25	0.420448	0.28027	0.10678		0.420448	0.0285572	14.723	9.81431	3.73916
21	19.65	29.29	9.64	7.01	2.63	0.161544				0.161544	0.0285572	5.65685
21	19.49	28.45	8.96	7.01	1.95	0.258816				0.258816	0.0285572	9.06307
24	19.29	29.09	9.8	7.01	2.79	0.144586	0.138899	0.011832		0.144586	0.0285572	5.06303	4.8639	0.414324
24	18.87	28.62	9.75	7.01	2.74	0.149685				0.149685	0.0285572	5.24157
24	18.89	28.93	10.04	7.01	3.03	0.122428				0.122428	0.0285572	4.28709
3	19.21	30.85	11.64	7.01	4.63	0.040386	0.0425545	0.0124091		0.040386	0.0285572	1.41421	1.49015	0.434533
3	18.9	30	11.1	7.01	4.09	0.0587202				0.0587202	0.0285572	2.05623
3	18.98	31.12	12.14	7.01	5.13	0.0285572				0.0285572	0.0285572	1
6	19.48	28.98	9.5	7.01	2.49	0.178006	0.277207	0.207855		0.178006	0.0285572	6.23332	9.70705	7.27854
6	19.3	29.83	10.53	7.01	3.52	0.0871715				0.0871715	0.0285572	3.05252
6	19.79	27.62	7.83	7.01	0.82	0.566442				0.566442	0.0285572	19.8353
