# Supplementary material for: Genome-wide identification of the PEBP genes in pears and the putative role of PbFT in flower bud differentiation
Source: PeerJ. 2020 Apr 9;8:e8928. doi: 10.7717/peerj.8928 (PMC7151754; doi:10.7717/peerj.8928)
Supplement: Supplemental Information 15 [file peerj-08-8928-s015.xlsx]

## Sheet: Sheet1
Sample Name	actin	Cq	ΔCt		ΔΔCt	2（-ΔΔCt）	averrage	S.E.
30DAB	18.9	25.01	6.11	5.53	0.58	0.668964	1.05697	0.349285
30DAB	19.99	24.92	4.93	5.53	-0.6	1.51572
30DAB	19.57	25.12	5.55	5.53	0.02	0.986233
45DAB	20.88	26.5	5.62	5.53	0.09	0.939523	0.614227	0.242894
45DAB	19.64	26.04	6.4	5.53	0.87	0.547147
45DAB	19.6	26.62	7.02	5.53	1.49	0.356013
60DAB	19.62	25.22	5.6	5.53	0.07	0.952638	0.812253	0.203237
60DAB	19.69	25.28	5.59	5.53	0.06	0.959264
60DAB	19.69	26.15	6.46	5.53	0.93	0.524858
75DAB	19.09	24	4.91	5.53	-0.62	1.53688	1.84236	0.228123
75DAB	19.85	24.45	4.6	5.53	-0.93	1.90528
75DAB	19.75	24.22	4.47	5.53	-1.06	2.08493
90DAB	20.03	24.68	4.65	5.53	-0.88	1.84038	1.74007	0.100831
90DAB	19.47	24.32	4.85	5.53	-0.68	1.60214
90DAB	21.3	26	4.7	5.53	-0.83	1.77769
105DAB	19.99	25.87	5.88	5.53	0.35	0.784584	0.748154	0.0594322
105DAB	19.5	25.62	6.12	5.53	0.59	0.664343
105DAB	20.34	26.2	5.86	5.53	0.33	0.795536
