# Supplementary material for: Genome-wide identification of the PEBP genes in pears and the putative role of PbFT in flower bud differentiation
Source: PeerJ. 2020 Apr 9;8:e8928. doi: 10.7717/peerj.8928 (PMC7151754; doi:10.7717/peerj.8928)
Supplement: Supplemental Information 16 [file peerj-08-8928-s016.xlsx]

## Sheet: gene23124
Sample Name	actin	Cq	ΔCt		ΔΔCt	2（-ΔΔCt）	average	S.E.
30DAB	18.7	25.68	6.98	7.44333	-0.463333	1.37872	1.02734	0.248474
30DAB	18.84	26.52	7.68	7.44333	0.236667	0.848704
30DAB	18.51	26.18	7.67	7.44333	0.226667	0.854607
45DAB	18.32	25.35	7.03	7.44333	-0.413333	1.33176	1.52851	0.495161
45DAB	19.66	25.96	6.3	7.44333	-1.14333	2.20891
45DAB	19.33	26.71	7.38	7.44333	-0.0633333	1.04488
60DAB	19.25	28.64	9.39	7.44333	1.94667	0.259415	0.421786	0.115034
60DAB	18.94	27.35	8.41	7.44333	0.966667	0.511687
60DAB	18.55	27.01	8.46	7.44333	1.01667	0.494257
75DAB	19.36	31.25	11.89	7.44333	4.44667	0.0458585	0.0680842	0.0187481
75DAB	18.67	30.02	11.35	7.44333	3.90667	0.066677
75DAB	18.7	29.59	10.89	7.44333	3.44667	0.091717
90DAB	20.58	33.14	12.56	7.44333	5.11667	0.0288224	0.0186651	0.00724102
90DAB	20.43	34.2	13.77	7.44333	6.32667	0.012459
90DAB	19.8	33.33	13.53	7.44333	6.08667	0.014714
105DAB	20.52	33.37	12.85	7.44333	5.40667	0.0235739	0.0269177	0.00955029
105DAB	20.65	32.74	12.09	7.44333	4.64667	0.0399222
105DAB	20.38	33.68	13.3	7.44333	5.85667	0.0172571

## Sheet: gene16540
Sample Name	actin	Cq	ΔCt		ΔΔCt	2（-ΔΔCt）	average	S.E.
30DAB	18.7	23.09	4.39	4.12667	0.263333	0.833161	1.01231	0.159121
30DAB	18.84	22.68	3.84	4.12667	-0.286667	1.21982
30DAB	18.51	22.66	4.15	4.12667	0.0233333	0.983957
45DAB	18.32	24.19	5.87	4.12667	1.74333	0.298679	0.555505	0.198733
45DAB	19.66	24.56	4.9	4.12667	0.773333	0.585064
45DAB	19.33	23.81	4.48	4.12667	0.353333	0.782773
60DAB	19.25	26.32	7.07	4.12667	2.94333	0.130007	0.201758	0.0508063
60DAB	18.94	25.16	6.22	4.12667	2.09333	0.234339
60DAB	18.55	24.73	6.18	4.12667	2.05333	0.240927
75DAB	19.36	28.5	9.14	4.12667	5.01333	0.0309625	0.0174796	0.00954624
75DAB	18.67	29.42	10.75	4.12667	6.62333	0.0101433
75DAB	18.7	29.29	10.59	4.12667	6.46333	0.0113329
90DAB	20.58	27.43	6.85	4.12667	2.72333	0.151424	0.159282	0.0187455
90DAB	20.43	27.38	6.95	4.12667	2.82333	0.141284
90DAB	19.8	26.36	6.56	4.12667	2.43333	0.185137
105DAB	20.52	24.78	4.26	4.12667	0.133333	0.911722	1.00743	0.189155
105DAB	20.65	24.43	3.78	4.12667	-0.346667	1.27162
105DAB	20.38	24.76	4.38	4.12667	0.253333	0.838956

## Sheet: PbFT
Sample Name	actin	Cq	ΔCt		ΔΔCt	2（-ΔΔCt）	average	S.E.
30DAB	18.7	25.82	7.12	7.03667	0.0833333	0.943874	1.00116	0.0482518
30DAB	18.84	25.79	6.95	7.03667	-0.0866667	1.06191
30DAB	18.51	25.55	7.04	7.03667	0.00333333	0.997692
45DAB	18.32	26.36	8.04	7.03667	1.00333	0.498846	0.738515	0.217717
45DAB	19.66	27.23	7.57	7.03667	0.533333	0.690956
45DAB	19.33	26.33	7	7.03667	-0.0366667	1.02574
60DAB	19.25	26.35	7.1	7.03667	0.0633333	0.95705	0.586427	0.26219
60DAB	18.94	27.33	8.39	7.03667	1.35333	0.391387
60DAB	18.55	26.87	8.32	7.03667	1.28333	0.410845
75DAB	19.36	25.34	5.98	7.03667	-1.05667	2.08012	2.81606	0.556728
75DAB	18.67	24.15	5.48	7.03667	-1.55667	2.94173
75DAB	18.7	23.96	5.26	7.03667	-1.77667	3.42634
90DAB	20.58	27.32	6.74	7.03667	-0.296667	1.2283	1.01653	0.330589
90DAB	20.43	28.33	7.9	7.03667	0.863333	0.549681
90DAB	19.8	26.49	6.69	7.03667	-0.346667	1.27162
105DAB	20.52	28.24	7.72	7.03667	0.683333	0.622725	0.845436	0.277646
105DAB	20.65	28.25	7.6	7.03667	0.563333	0.676737
105DAB	20.38	27.11	6.73	7.03667	-0.306667	1.23685
