# Supplementary material for: Genome-wide identification of the PEBP genes in pears and the putative role of PbFT in flower bud differentiation
Source: PeerJ. 2020 Apr 9;8:e8928. doi: 10.7717/peerj.8928 (PMC7151754; doi:10.7717/peerj.8928)
Supplement: Supplemental Information 17 [file peerj-08-8928-s017.xlsx]

## Sheet: Relative expression of FT
	Sample Name	actin	Cq	ΔCt		ΔΔCt	2（-ΔΔCt）	average	S.E.		correct	lest	correct	average	S.E.
Treatment	45DAB	19.38	24.79	5.41	5.01444	0.395556	0.760197	1.02563	0.2297		0.760197	0.179797	4.22807	5.70434	1.27755
	45DAB	19.4367	24.4567	5.02	5.01444	0.00555556	0.996157				0.996157	0.179797	5.54044
	45DAB	19.7233	24.3367	4.61333	5.01444	-0.401111	1.32052				1.32052	0.179797	7.34451
	75DAB	19.7	24.615	4.915	5.01444	-0.0994444	1.07136	0.863793	0.194679		1.07136	0.179797	5.95871	4.80426	1.08277
	75DAB	19.6133	24.7533	5.14	5.01444	0.125556	0.916651				0.916651	0.179797	5.09824
	75DAB	19.11	24.8533	5.74333	5.01444	0.728889	0.603368				0.603368	0.179797	3.35582
	105DAB	19.2533	25.38	6.12667	5.01444	1.11222	0.462581	0.313532	0.115953		0.462581	0.179797	2.57279	1.74381	0.644907
	106DAB	19.4367	26.9267	7.49	5.01444	2.47556	0.179797				0.179797	0.179797	1
	107DAB	19.27	26.03	6.76	5.01444	1.74556	0.298219				0.298219	0.179797	1.65864
Natural condition	45DAB	19.58	24.7167	5.13667	5.01444	0.122222	0.918771	0.488869	0.30501		0.918771	0.179797	5.11004	2.719	1.69641
	45DAB	19.2133	25.9433	6.73	5.01444	1.71556	0.304485				0.304485	0.179797	1.69349
	45DAB	19.4033	26.4567	7.05333	5.01444	2.03889	0.243351				0.243351	0.179797	1.35347
	75DAB	19.6567	23.6633	4.00667	5.01444	-1.00778	2.01081	2.23892	0.332467		2.01081	0.179797	11.1838	12.4525	1.84912
	75DAB	19.57	23.1467	3.57667	5.01444	-1.43778	2.70903				2.70903	0.179797	15.0671
	75DAB	19.37	23.3867	4.01667	5.01444	-0.997778	1.99692				1.99692	0.179797	11.1065
	105DAB	19.0667	25.99	6.92333	5.01444	1.90889	0.266298	0.368607	0.113251		0.266298	0.179797	1.4811	2.05012	0.629882
	106DAB	19.6233	25.5633	5.94	5.01444	0.925556	0.526478				0.526478	0.179797	2.92817
	107DAB	19.6567	26.3467	6.69	5.01444	1.67556	0.313046				0.313046	0.179797	1.7411

## Sheet: day length
		Treatment	Natural condition
	DAB30	13.3228	14.1308
	DAB45	13.5281	14.5569
	DAB60	13.6261	14.8358
	DAB75	13.5997	14.8897
	DAB90	13.4758	14.7339
	DAB105	13.2867	14.3958
	DAB120	13.0519	13.8894
